# Supplementary material for: CRMP2 Is Involved in Regulation of Mitochondrial Morphology and Motility in Neurons
Source: MDPI journal article supplement (doi:10.3390/cells10102781), 2021-10-17
Supplement: s1 [file s1]

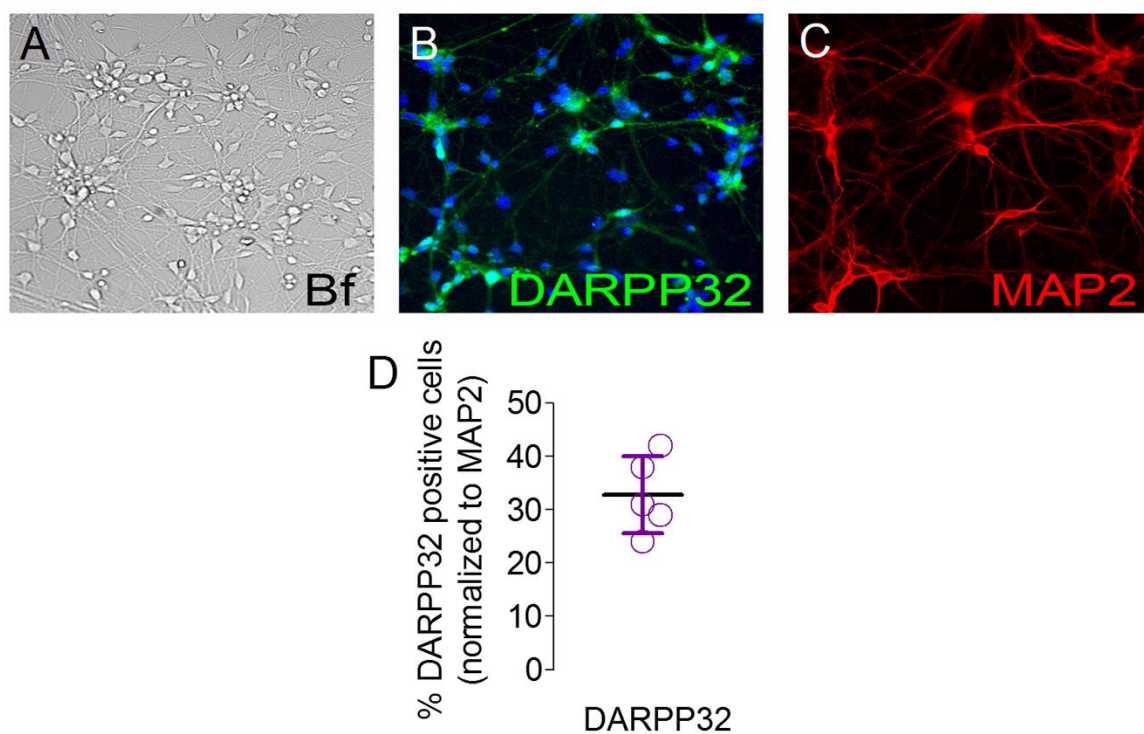

**Figure S1.** Representative images of neuronal-glial co-culture used in our experiments. (A) bright field image. (B) DARPP32 staining (green), DAPI, nuclear staining (blue). (C), MAP2 staining. (D), Percentage of DARPP32-positive cells. Data are mean  $\pm$  SD,  $n = 5$  separate platings. The colored circles indicate data from individual measurements.
